# Supplementary material
Source: PubMed Central journal article supplement (PMC2020812)
Supplement: NIHMS29133-supplement-supplement_1.pdf [file NIHMS29133-supplement-supplement_1.pdf]

**Supplementary Data for “Kinetic Discrimination of tRNA Identity by the Conserved motif 2 loop of a Class II Aminoacyl-tRNA Synthetase”****Ethan Guth & Christopher Francklyn****Figure Legends****Figure S1. Single turnover Progress curves for mutant tRNA<sup>His</sup> and mutant HisRS.**

HisRS with preformed adenylate was rapidly mixed with tRNA<sup>His</sup> mutants at 37 °C, pH 7.5 in the RQF-3 quench flow apparatus. The accumulation of product was monitored as described in Experimental Procedures. **A.**, 5'-ppp tRNA<sup>His</sup>/wt HisRS. **B.**, wt tRNA<sup>His</sup>/E115A HisRS. **C.**, wt tRNA<sup>His</sup>/Q118E HisRS. **D.**, wt tRNA<sup>His</sup>/R116A HisRS. **E.**, wt tRNA<sup>His</sup>/R123A HisRS.

**Figure S2. Multiple turnover progress curves for mutant HisRS and mutant tRNA<sup>His</sup> comparing the production of [<sup>32</sup>P]-AMP and [<sup>14</sup>C]-His~tRNA<sup>His</sup> at pH 7.5 and 37°C.**

Multiple turnover progress curves for wild type tRNA<sup>His</sup> and mutant HisRS comparing the production of AMP and His-tRNA at pH 7.5 and 37°C. **A, B.** Representative enzyme-tRNA combinations in which  $k_{\text{trans}}$  was greater than  $k_{\text{cat}}$ , and progress curves for the two products were linear. The plots for wt tRNA<sup>His</sup>/E115A, and wt tRNA<sup>His</sup>/Q127A HisRS are depicted here. **C, D, E.** Enzyme-tRNA combinations in which there was a burst of AMP formation in the first turnover. The plots for wt tRNA<sup>His</sup>/R123A HisRS, and wt tRNA<sup>His</sup>/Q118A HisRS and wt tRNA<sup>His</sup>/R116A HisRS are depicted here.

**Figure S3. Rate of decay curve for histidyl-adenylate preformed on HisRS in the absence of tRNA.** The adenylate complex was formed in the presence of excess histidine and ATP, purified by spin chromatography, and then incubated at 37 °C. The amount of adenylate remaining was quantitated by subsequent re-chromatography of aliquots through G25 Sephadex spin columns. Similar kinetics were obtained by enzyme histidyl:adenylate capture using nitrocellulose filtration.

**A**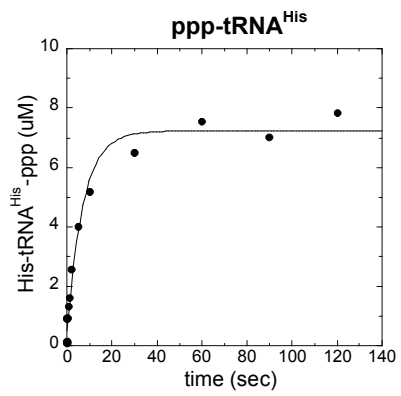**B**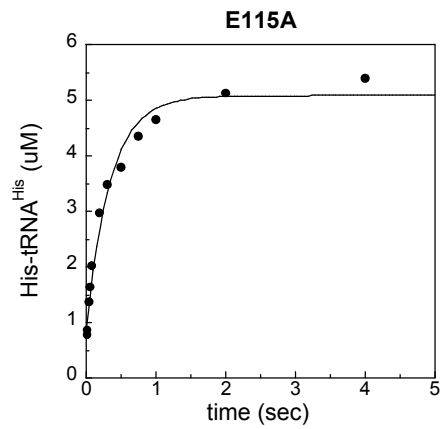**C**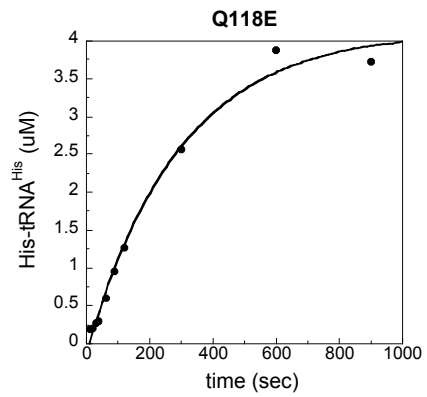**D**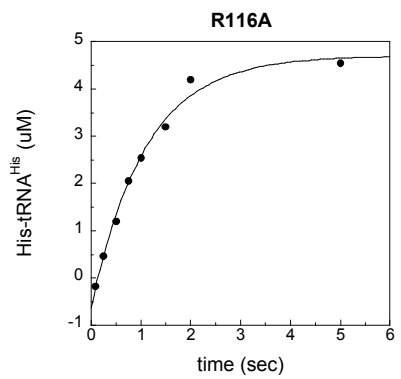**E**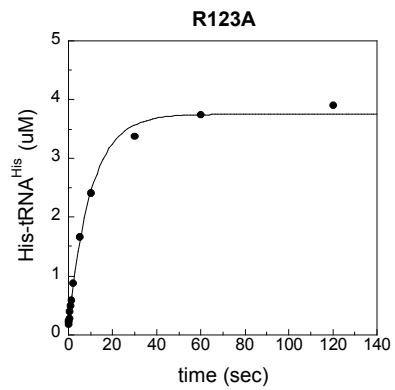

A

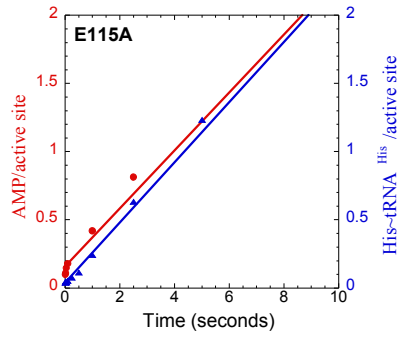

B

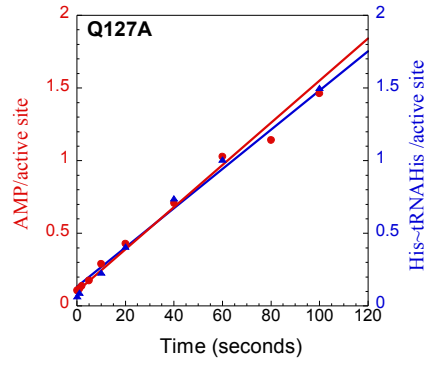

C

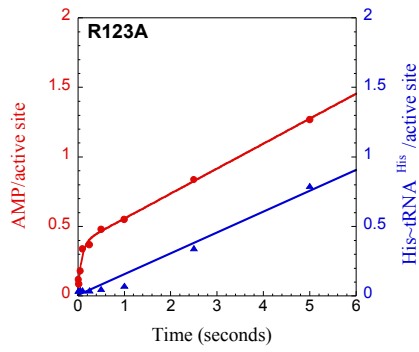

D

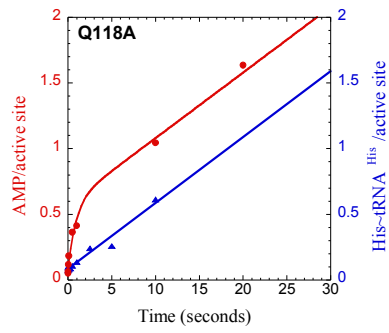

E

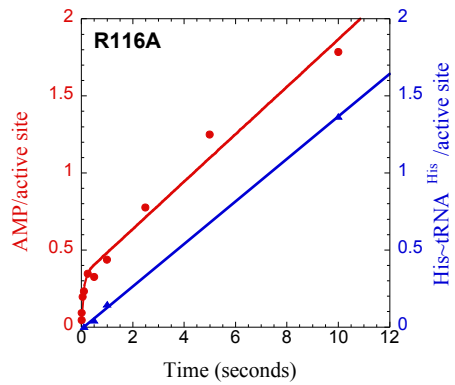

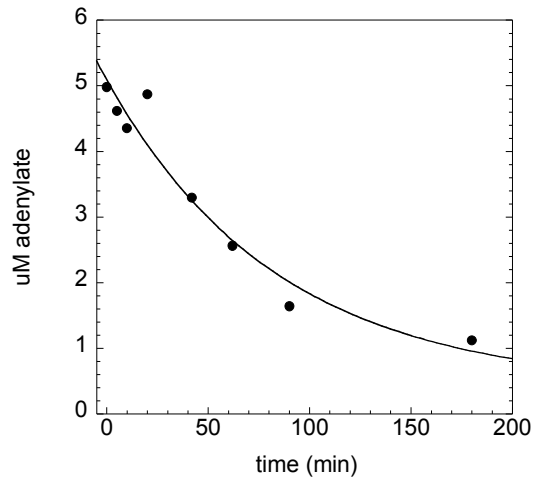

Guth & Francklyn Figure S3
